# Supplementary material for: Homology directed telomere clustering, ultrabright telomere formation and nuclear envelope rupture in cells lacking TRF2B and RAP1
Source: PubMed Central journal article supplement (PMC10104862; doi:10.1038/s41467-023-37761-w), 2023-04-14
Supplement: 41467_2023_37761_MOESM1_ESM.pdf [file 41467_2023_37761_MOESM1_ESM.pdf]

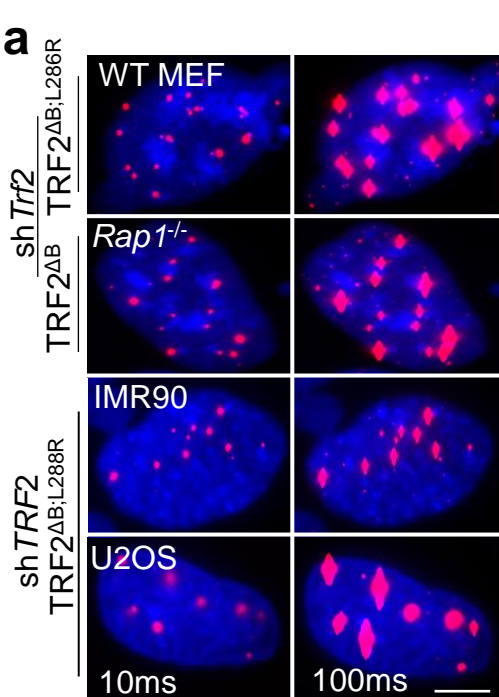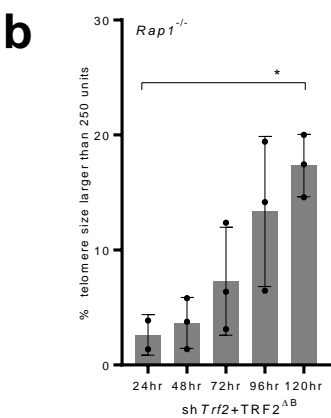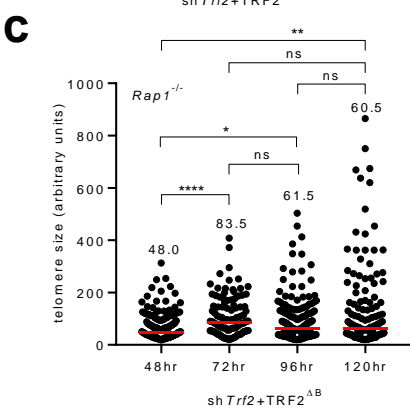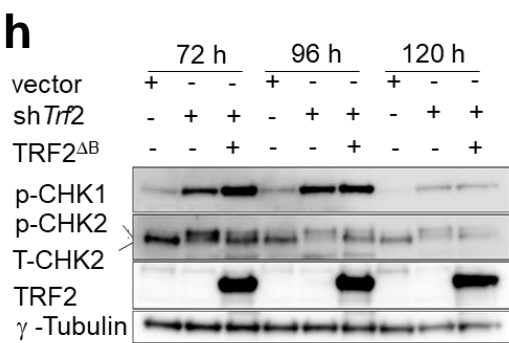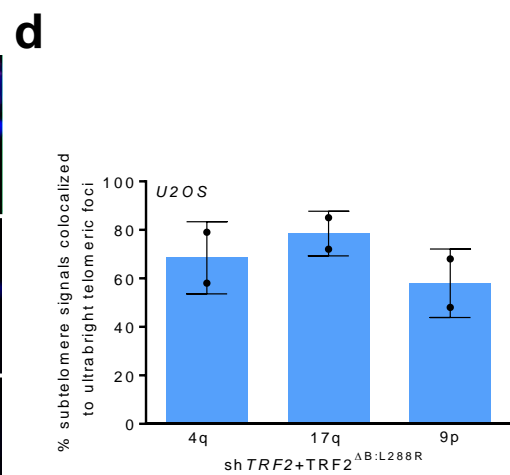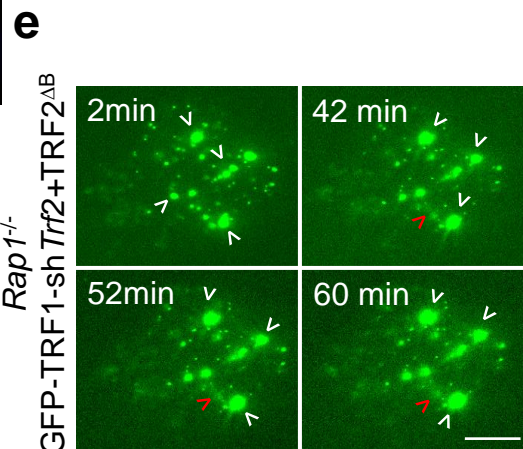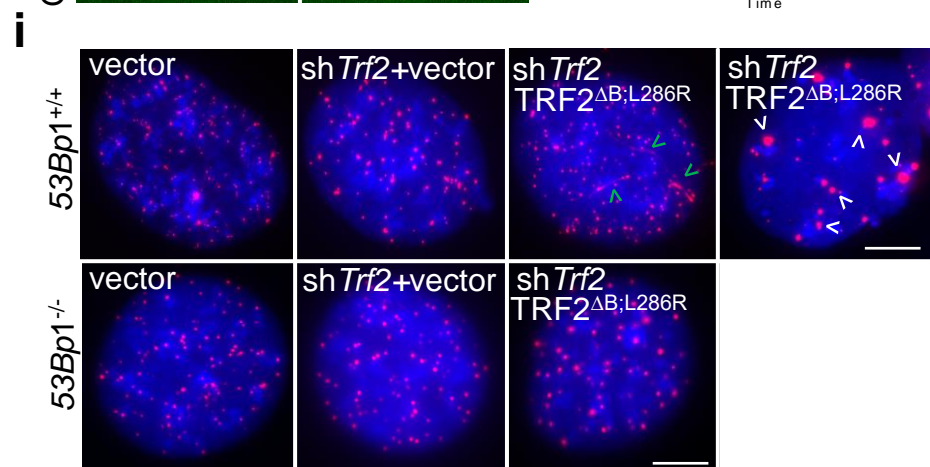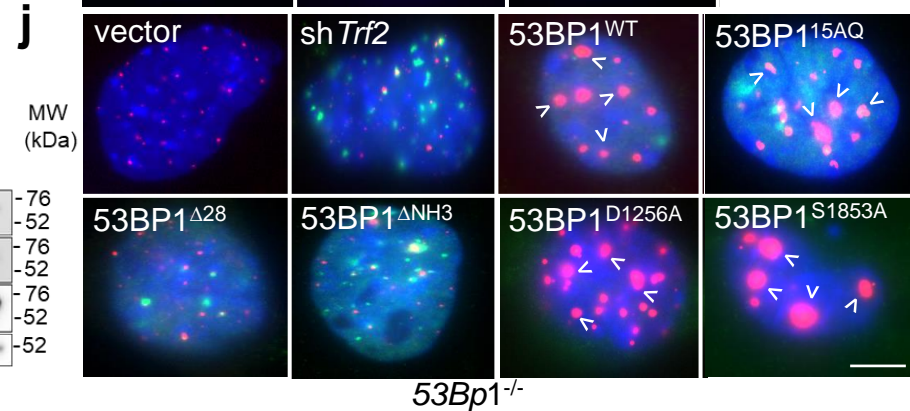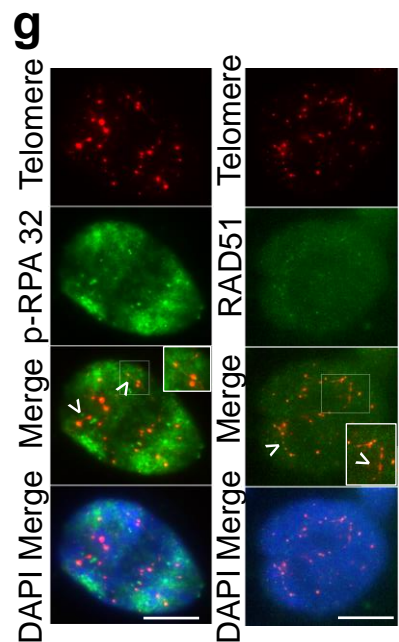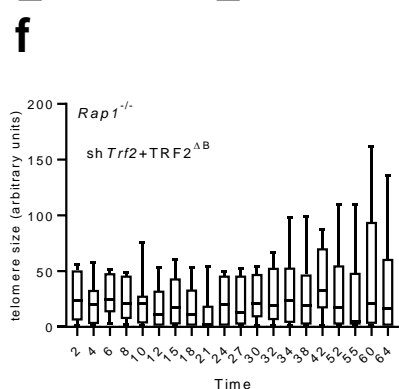

**Supplementary Fig. 1 a.** Representative PNA-FISH of interphase nuclei from three independent experiments reveal UT foci in U2OS, IMR90, WT and *Rap1*<sup>-/-</sup> MEFs expressing the indicated DNA constructs imaged at 10ms and 100ms exposures. At 100ms exposure, UTs saturate the CCD detectors, causing blooming artifacts (diamond shaped foci). Scale bars: 5µm. **b.** Quantification of UTs larger than 250 arbitrary units in *Rap1*<sup>-/-</sup> MEFs expressing *shTrf2* + TRF2<sup>ΔB</sup> at the indicated time. Data represents the mean of three independent experiments ± SD from a minimum 200 nuclei analyzed per experiment. \**P*=0.0241 by one-way ANOVA. **c.** Quantification of telomere size in *Rap1*<sup>-/-</sup> MEFs expressing *shTrf2* + TRF2<sup>ΔB</sup> at the indicated times from one representative experiment. At least a minimum 200 nuclei analyzed per experiment. Red line: median. \**P*=0.0113, \*\**P*=0.051, \*\*\*\**P*<0.0001 by Kruskal-Wallis test with Dunn's multiple comparison. ns: non-significant. **d.** Percent UTs colocalized with chromosome specific sub telomere in U2OS cells expressing TRF2<sup>ΔB;L288R</sup>. Mean value ± SD from two independent experiments are shown. **e.** Live cell imaging using GFP-TRF1 as the telomere marker (green) in *Rap1*<sup>-/-</sup> MEFs expressing *shTrf2* + TRF2<sup>ΔB</sup> over the indicated times. Telomere bridges and UTs are shown with red and white arrowheads, respectively. Scale bars: 5µm. **f.** Quantification of telomere sizes over time due to telomere-telomere clustering in (e) from one representative experiment. Box show the median and interquartile range (25% to 75%). **g.** Representative image from two independent experiments showing telomeric bridges co-localized with p-RPA32 or RAD51 in *Rap1*<sup>-/-</sup> MEFs expressing *shTrf2* + TRF2<sup>ΔB</sup>. Arrowheads point to sites of p-RPA32 or RAD51 localization on the telomere bridges. Insets show enlarged images. Scale bars: 5µm. **h.** Immunoblots for phospho (p)-CHK2 and p-CHK1 in *Rap1*<sup>-/-</sup> MEFs expressing TRF2<sup>ΔB</sup> reveal the presence of increased single-stranded DNA mediated damage when both RAP1 and TRF2<sup>B</sup> are deleted. γ-Tubulin used as loading control. The blot shown is the representative of two independent experiments. **i.** Representative PNA-FISH of interphase nuclei from two independent experiments showing CCCTAA-positive filaments (green arrowheads) and UTs (white arrowheads) in interphase nuclei of *53Bp1*<sup>+/+</sup> and *53Bp1*<sup>-/-</sup> MEFs expressing *shTrf2* + TRF2<sup>ΔB;L286R</sup>. Scale bars: 5µm. **j.** Representative IF-FISH from two independent experiments for HA-tagged 53BP1 (green) in the interphase nuclei showing UT foci in *53Bp1*<sup>-/-</sup> reconstituted with either HA-53BP1<sup>WT</sup> or indicated 53BP1 mutants in the presence of *shTrf2* + TRF2<sup>ΔB;L286R</sup>. Arrowheads point to UTs. Scale bars: 5µm.

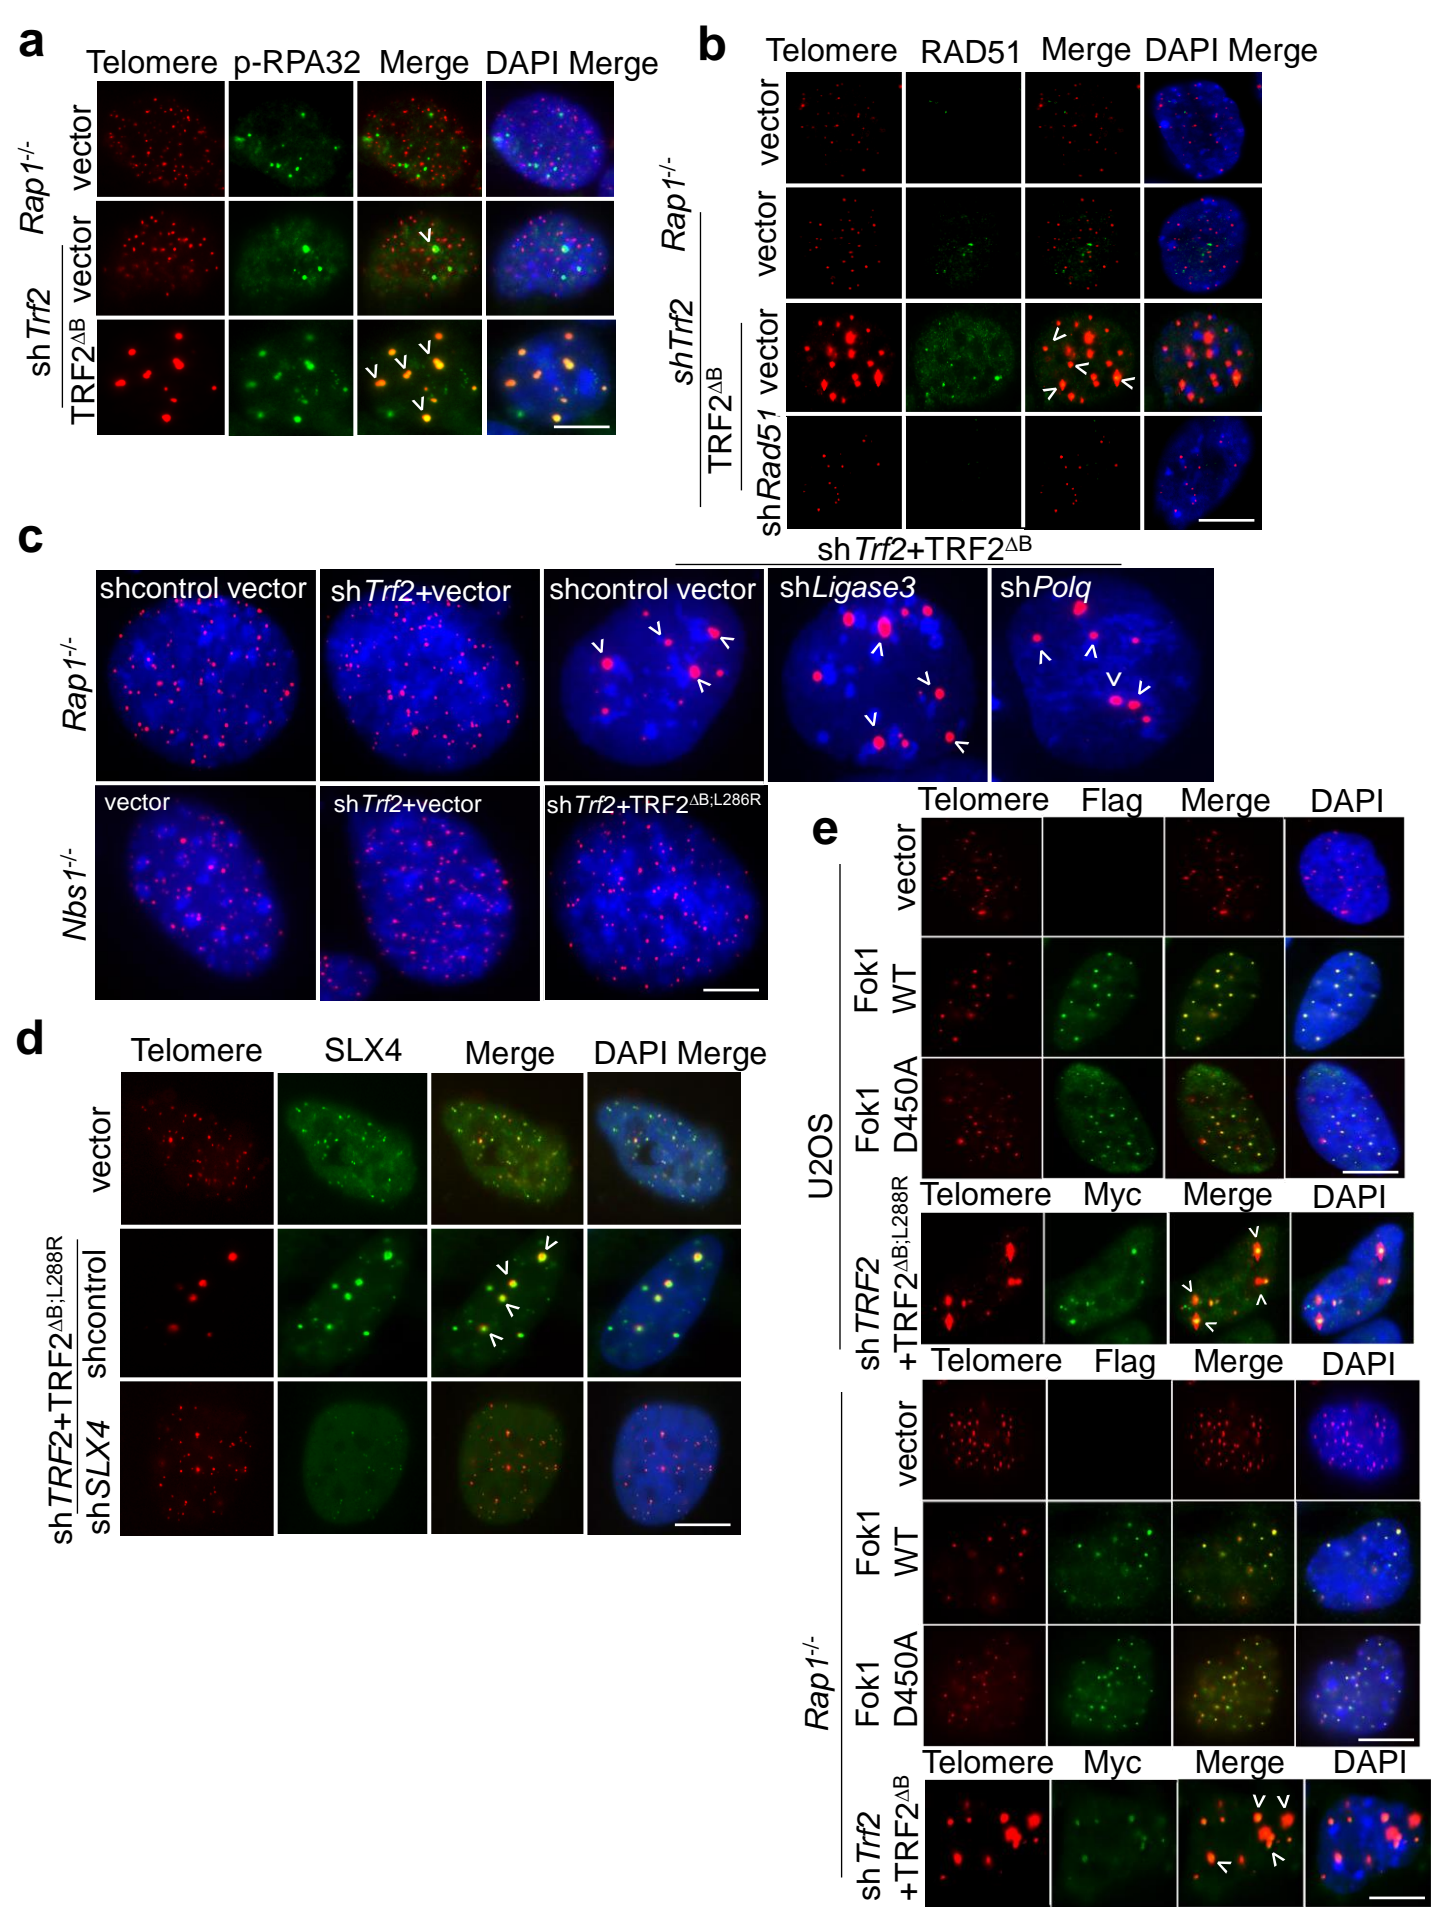

**Supplementary Fig. 2 a.** Representative IF-FISH images from three independent experiments showing p-RPA32 (S33) (green) co-localized with UTs in *Rap1*<sup>-/-</sup> MEFs cells expressing TRF2<sup>ΔB</sup>. Scale bars: 5μm. **b.** Representative IF-FISH images from three independent experiments revealed that RAD51 (green) co-localized with UTs in *Rap1*<sup>-/-</sup> MEFs expressing TRF2<sup>ΔB</sup>. Scale bars: 5μm. **c.** Representative PNA-FISH of interphase nuclei from two independent experiments showing UTs in the absence of NBS1 and factors that promote A-NHEJ. Arrowheads point to UTs. Scale bars: 5μm. **d.** Representative IF-FISH images from three independent experiments showing the effect of SLX4 depletion in generation of UTs in U2OS cells treated with shTRF2+TRF2<sup>ΔB;L288R</sup>. Scale bars: 5μm. **e.** Representative IF-FISH images from three independent experiments showing small telomere foci (arrowheads) upon expressing Flag-tagged TRF1 WT FokI and FokI<sup>D450A</sup> (green) in U2OS cells (100ms exposures). Middle and bottom panels show that UTs (arrowheads) are significantly larger than FokI induced foci in U2OS and *Rap1*<sup>-/-</sup> MEFs expressing TRF2<sup>ΔB;L288R</sup> and TRF2<sup>ΔB;L286R</sup> (100 ms exposure). Scale bars: 5μm.

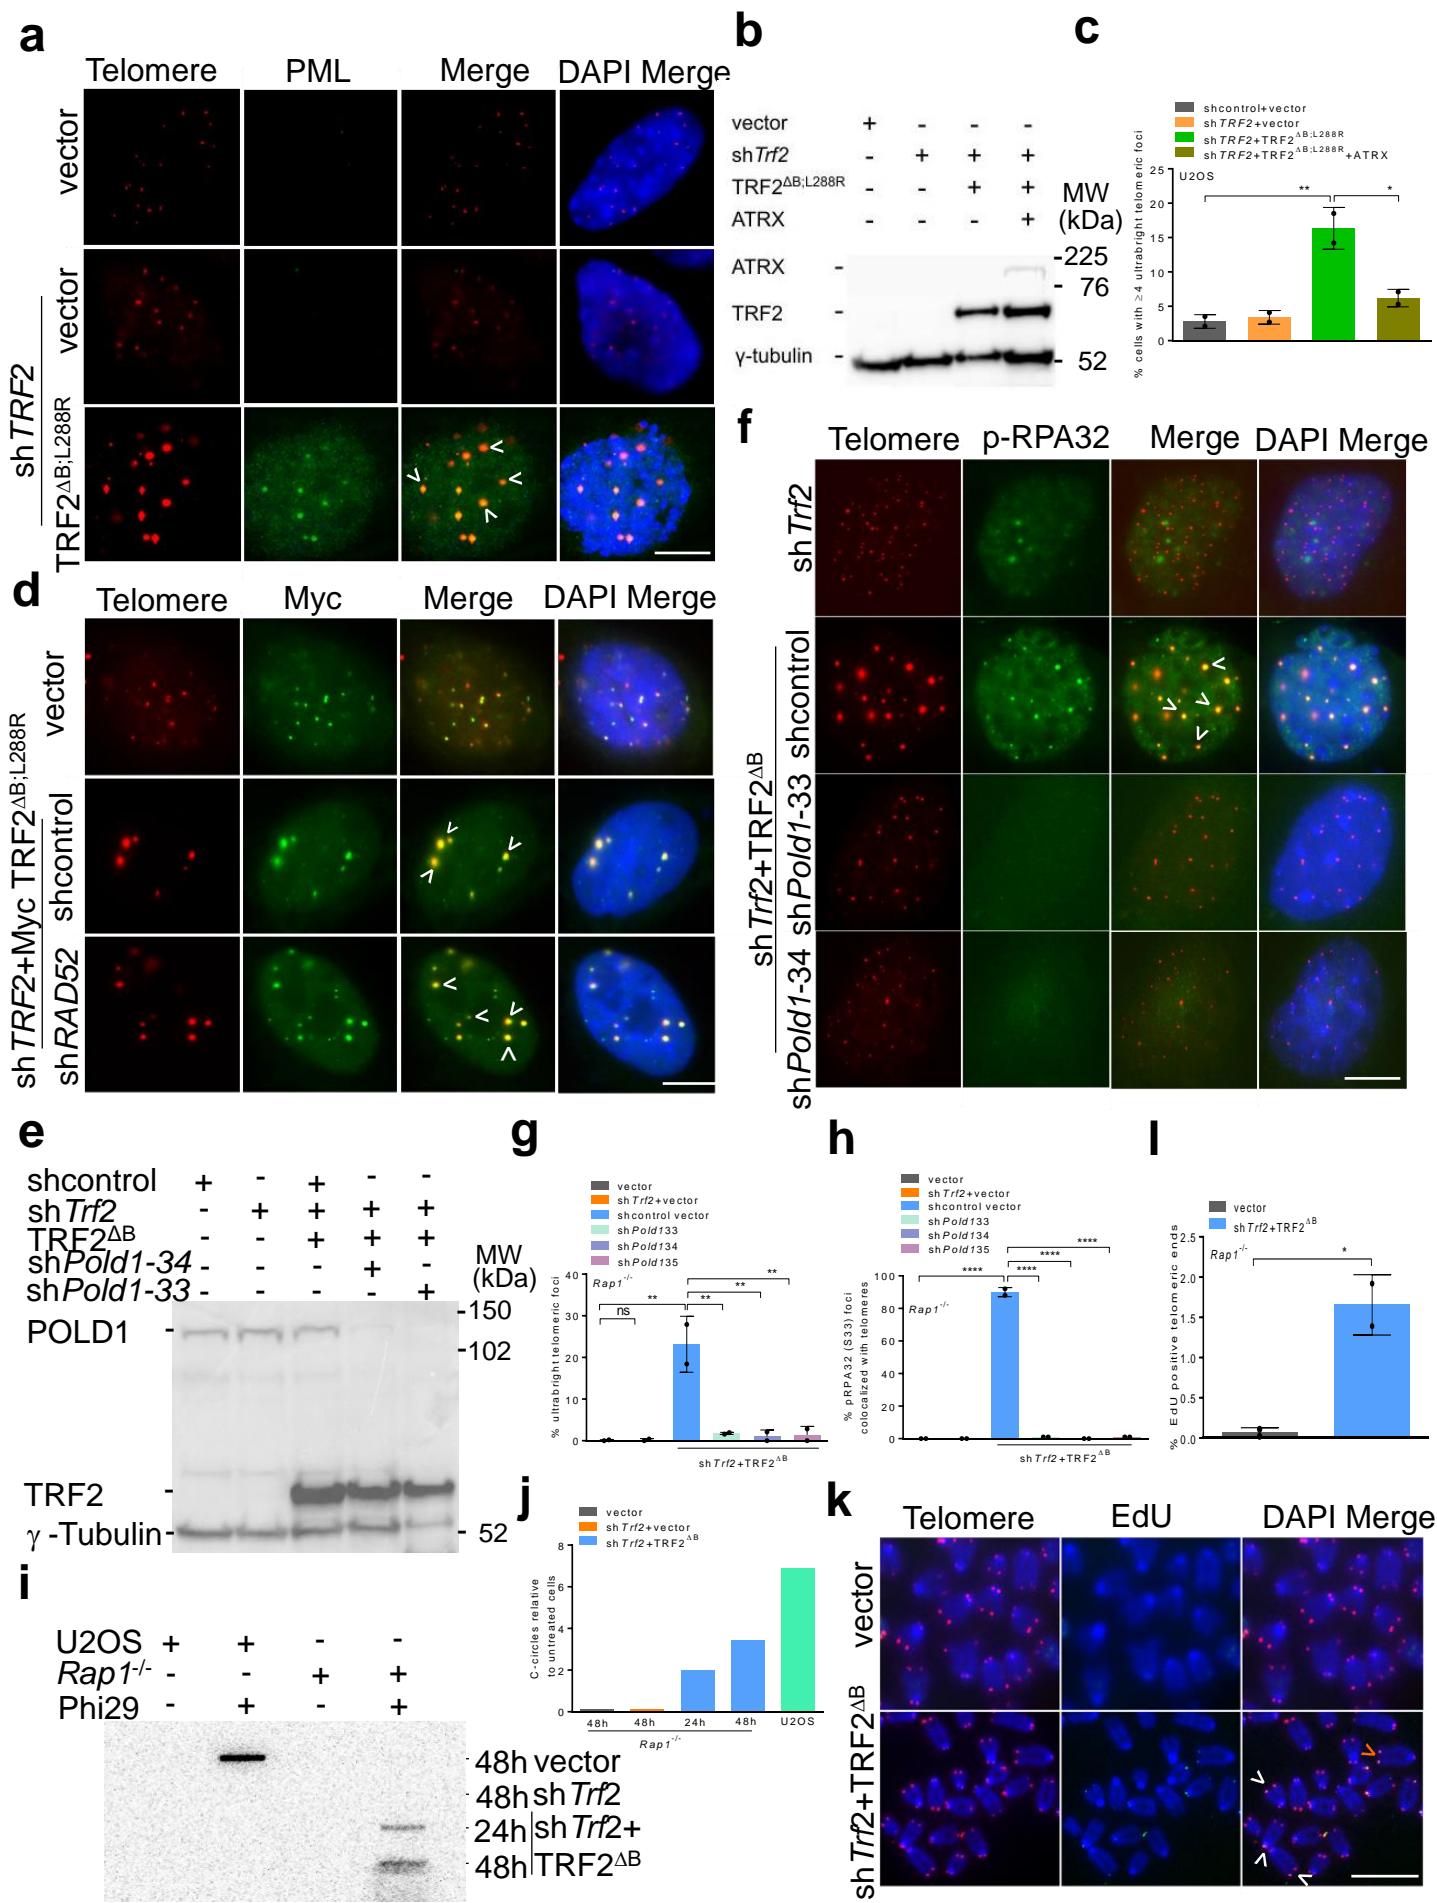

**Supplementary Fig. 3 a.** Representative images of IF-FISH from three independent experiments showing that PML bodies (green) co-localized with UTs in U2OS cells expressing *shTRF2+TRF2<sup>ΔB;L288R</sup>*. Scale bars: 5μm. **b.** Immunoblot showing the reconstitution of GFP-ATRAX in U2OS cells. Anti-GFP and anti-Myc antibodies used to detect ATRX and TRF2 protein.  $\gamma$ -Tubulin served as loading control. The blot shown is the representative of two independent experiments. **c.** Quantification of UTs in GFP-ATRAX reconstituted U2OS cells. Data shown as the mean of two experiments with  $\pm$  SD from a minimum 250 nuclei analyzed per experiment. \* $P=0.0163$ , \*\* $P=0.0057$  by one-way ANOVA. **d.** Representative images of IF-FISH from three independent experiments showing the effect of RAD52 depletion in the generation of UTs in U2OS cells treated with *shTRF2+TRF2<sup>ΔB;L288R</sup>*. Scale bars: 5μm. Myc antibody (green) is used to detect TRF2. **e.** Immunoblot showing knockdown efficiency of *Pold1* with three different shRNAs in *Rap1<sup>-/-</sup>* MEFs expressing indicated DNAs. Anti-POLD1 and TRF2 antibody used to detect POLD1 and TRF2 proteins.  $\gamma$ -Tubulin served as loading control. The blot shown is the representative of two independent experiments. **f.** Representative IF-FISH images showing depletion of POLD1 reduced the formation of UTs and p-RPA32 (S33) (green) TIFs in *Rap1<sup>-/-</sup>* cells treated with *shTrf2+TRF2<sup>ΔB</sup>*. Scale bars: 5μm. **g.** Quantification of UTs in (f). Data represents the mean of two independent experiments  $\pm$  SD from a minimum 350 nuclei analyzed per experiment. \*\* $P=0.0017$  by one-way ANOVA. ns: non-significant. **h.** Quantification of percent UTs co-localized with p-RPA32 (S33) in (f). Data represents the mean of two independent experiments  $\pm$  SD from a minimum 350 nuclei analyzed per experiment. \*\*\*\* $P<0.0001$  by one-way ANOVA. **i.** C-circle analysis using 400μg genomic DNA isolated from *Rap1<sup>-/-</sup>* MEFs expressing indicated DNAs in the absence and presence Phi29 DNA polymerase. 400μg genomic DNA from U2OS cells was used as positive control. **j.** Quantification of Phi29 dependent C-circles from one representative experiment in (i). The level of <sup>32</sup>P incorporation in the Phi29 negative control samples was subtracted from the samples that contained the Phi29 DNA polymerase. **k.** Representative metaphase image showing MiDAS in *Rap1<sup>-/-</sup>* MEFs expressing *TRF2<sup>ΔB</sup>*. EdU labelled (green) telomeres were detected using PNA probe (red), DAPI used to stain nuclei (blue). EdU signal in a single (white arrowheads) or both chromatids (orange arrowhead). **l.** Quantification of percent EdU positive telomeres in (k). Data presents the mean of two experiments  $\pm$  SD from 30 metaphase with each sample analyzed per experiment. \* $P=0.0274$  by two-sided unpaired t-test.

**a**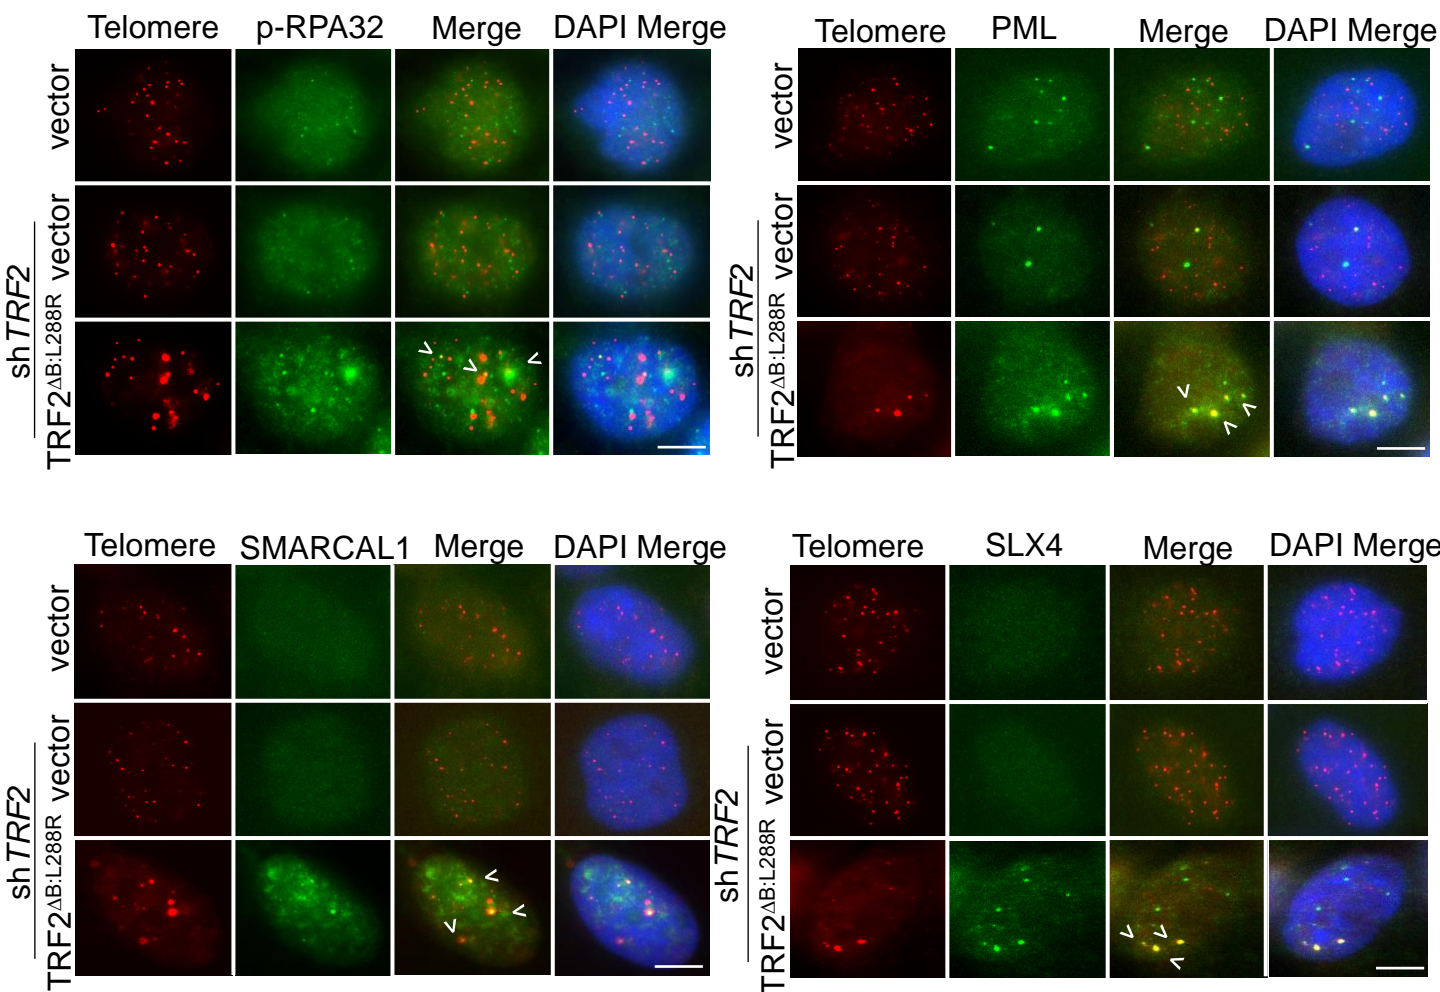**b**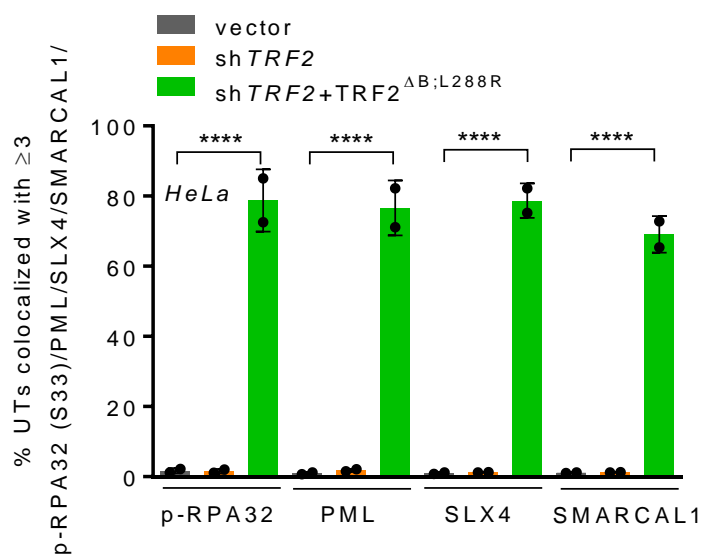

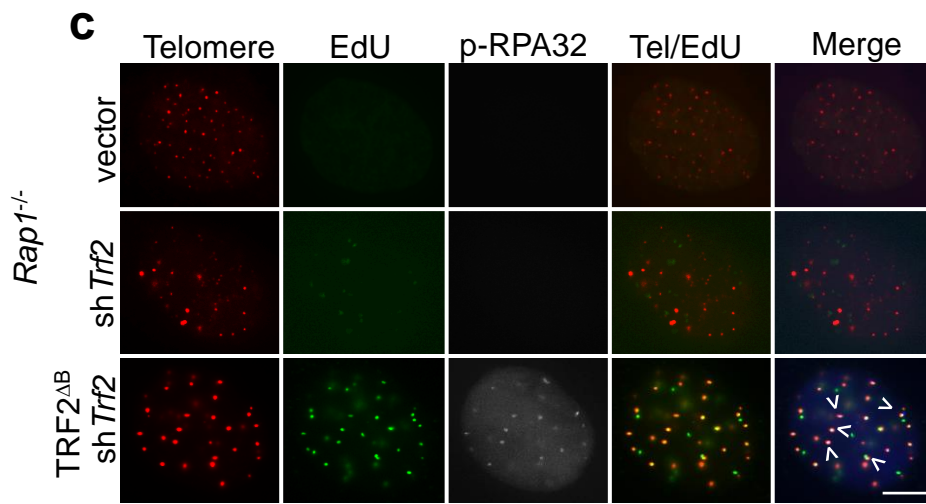

**d**

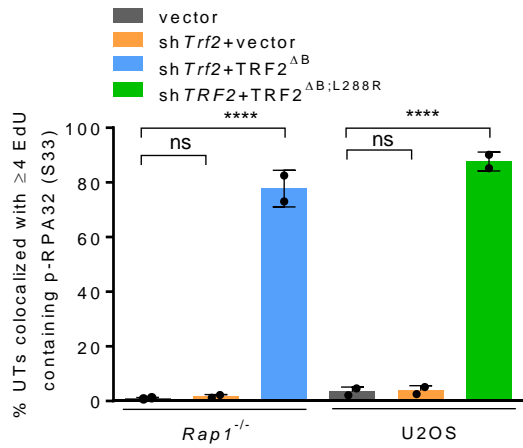

**e**

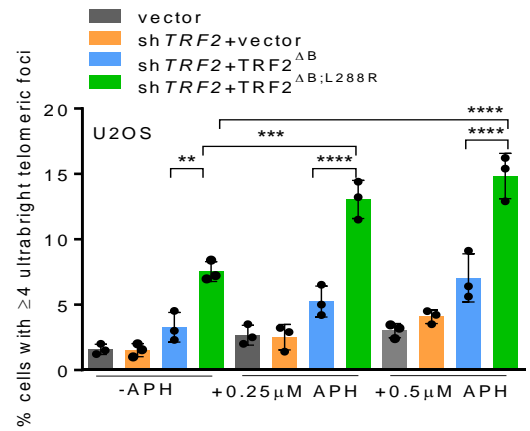

**f**

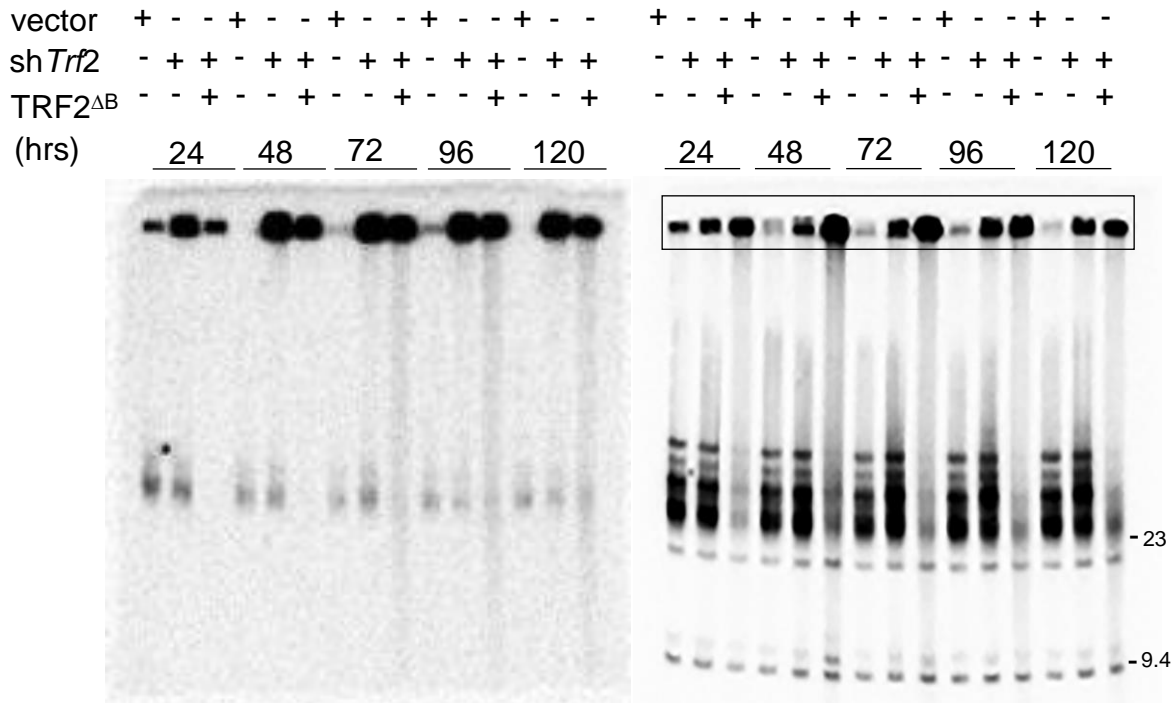



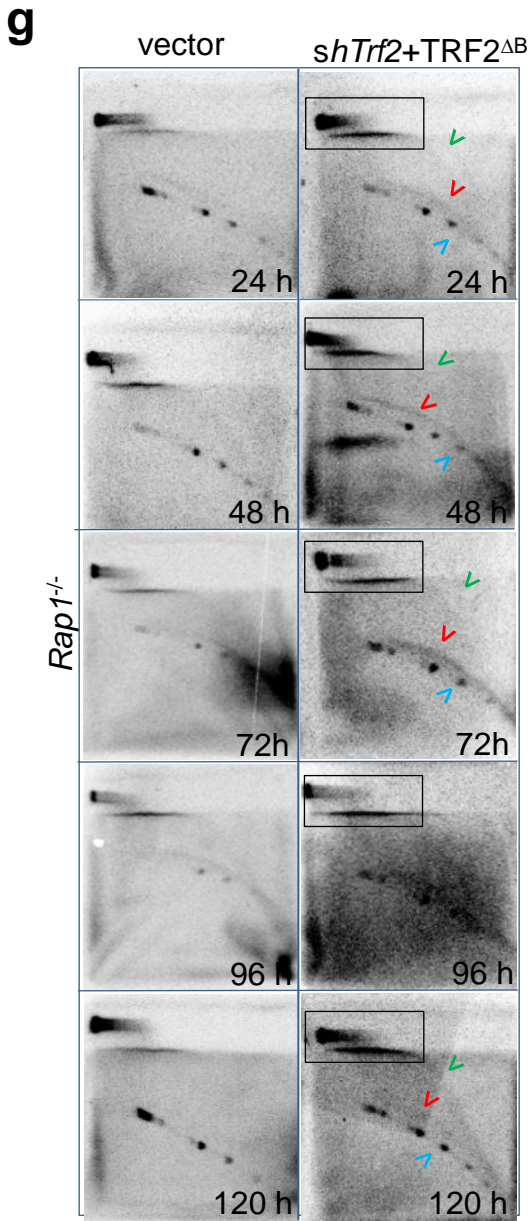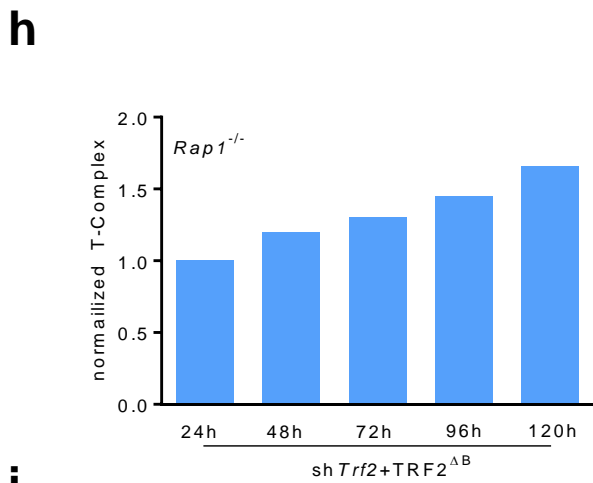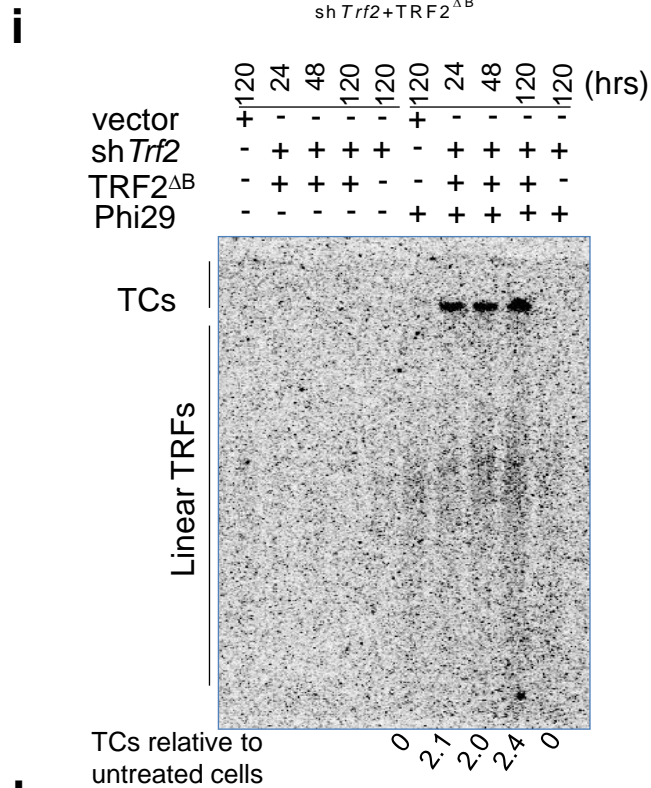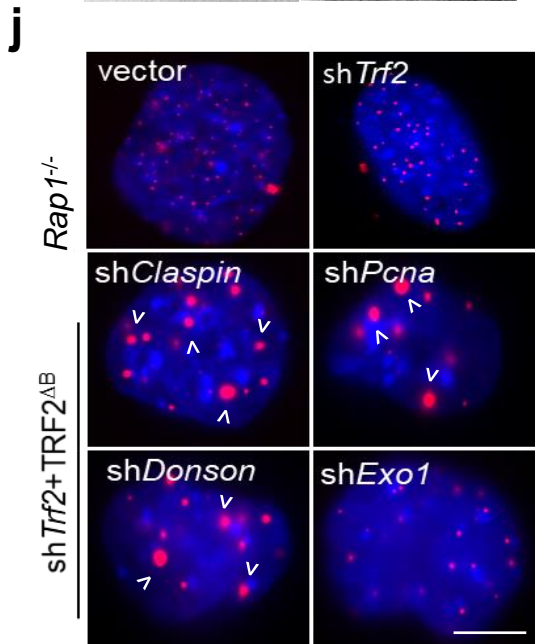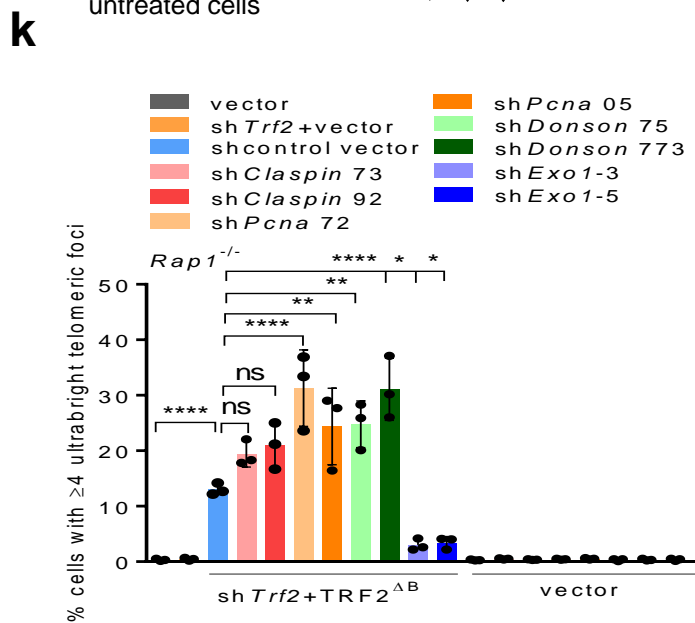

**Supplementary Fig. 4 a.** Representative IF-FISH showing UTs colocalized with p-RPA32 (S33), PML, SLX4 and SMARCAL1 foci in HeLa cells. White arrowheads point to UTs colocalized to the indicated proteins. Scale bars: 5 $\mu$ m. **b.** Quantification of percent UTs colocalized to HDR factors in HeLa cells expressing TRF2<sup>ΔB</sup>:L288R. Two independent experiments shown as  $\pm$  SD from a minimum 150 nuclei analyzed per experiment. \*\*\*\* $P < 0.0001$  by one-way ANOVA. **c.** Representative IF-FISH images showing the localization of telomeres (red) with EdU (green) containing p-RPA32 (S33) (blue) in *Rap1*<sup>-/-</sup> MEFs expressing indicated constructs. Scale bars: 5 $\mu$ m. **d.** Quantification of percent telomeres colocalized with EdU containing p-RPA32 (S33) in (c). Data represents the mean of two independent experiments  $\pm$  SD from a minimum 200 nuclei analyzed per experiment. \*\*\*\* $P < 0.0001$  by one-way ANOVA. ns: non-significant. **e.** Quantification of UT frequencies in U2OS cells expressing the indicated DNA constructs and with  $\pm$  0.25 $\mu$ M / 0.5 $\mu$ M aphidicolin (APH) treatment. Data represents the mean of three independent experiments  $\pm$  SD from a minimum 300 nuclei analyzed per experiment. \*\* $P = 0.0033$ , \*\*\* $P = 0.0001$ , \*\*\*\* $P < 0.0001$  by one-way ANOVA. **f.** In-gel single strand G overhang (native, left panel) and total telomere (denatured, right panel) analysis in *Rap1*<sup>-/-</sup> MEFs expressing the indicated cDNA constructs at the indicated time point. Normalized telomeric DNA trapped in the well (outlined by the box) at indicated time point quantified. Signal intensities in vector was set at 100% after normalizing with sub telomeres signals that served as an internal loading control, see Fig. 4f for quantification. **g.** T-complex and T-circle analysis using two-dimensional (2D) gel electrophoresis from genomic DNA isolated from *Rap1*<sup>-/-</sup> MEFs expressing TRF2<sup>ΔB</sup> at indicated time point. T-complex (outlined by the box), TCs (green arrowheads), ss-G (red arrowheads), ds-TRF (blue arrowheads). **h.** Quantification of T-complex from one representative experiment in (g). T complex signal intensities in vector was set at 100%. **i.** T-circle assay showing ECTRs at indicated timepoint in *Rap1*<sup>-/-</sup> MEFs expressing TRF2<sup>ΔB</sup>. Phi29 dependent amplification and linear telomere restriction fragments (TRFs) products of TCs were detected by in-gel hybridization using 32P-labeled-T<sub>2</sub>AG<sub>3</sub> telomeric probes. Quantification of TCs relative to untreated Phi29 negative samples from one representative experiment shown. **j.** PNA-FISH of interphase nuclei showing UTs in *Rap1*<sup>-/-</sup> MEFs expressing indicated shRNA constructs against CPD complex and EXO1. Scale bars: 5 $\mu$ m. **k.** Quantification of UT frequencies in (j). Data represents the mean of three independent experiments  $\pm$  SD from a minimum 300 nuclei analyzed per experiment. \* $P = 0.0214$ , \*\* $P = 0.0048$ , \*\*\*\* $P < 0.0001$  by one-way ANOVA. ns: non-significant.

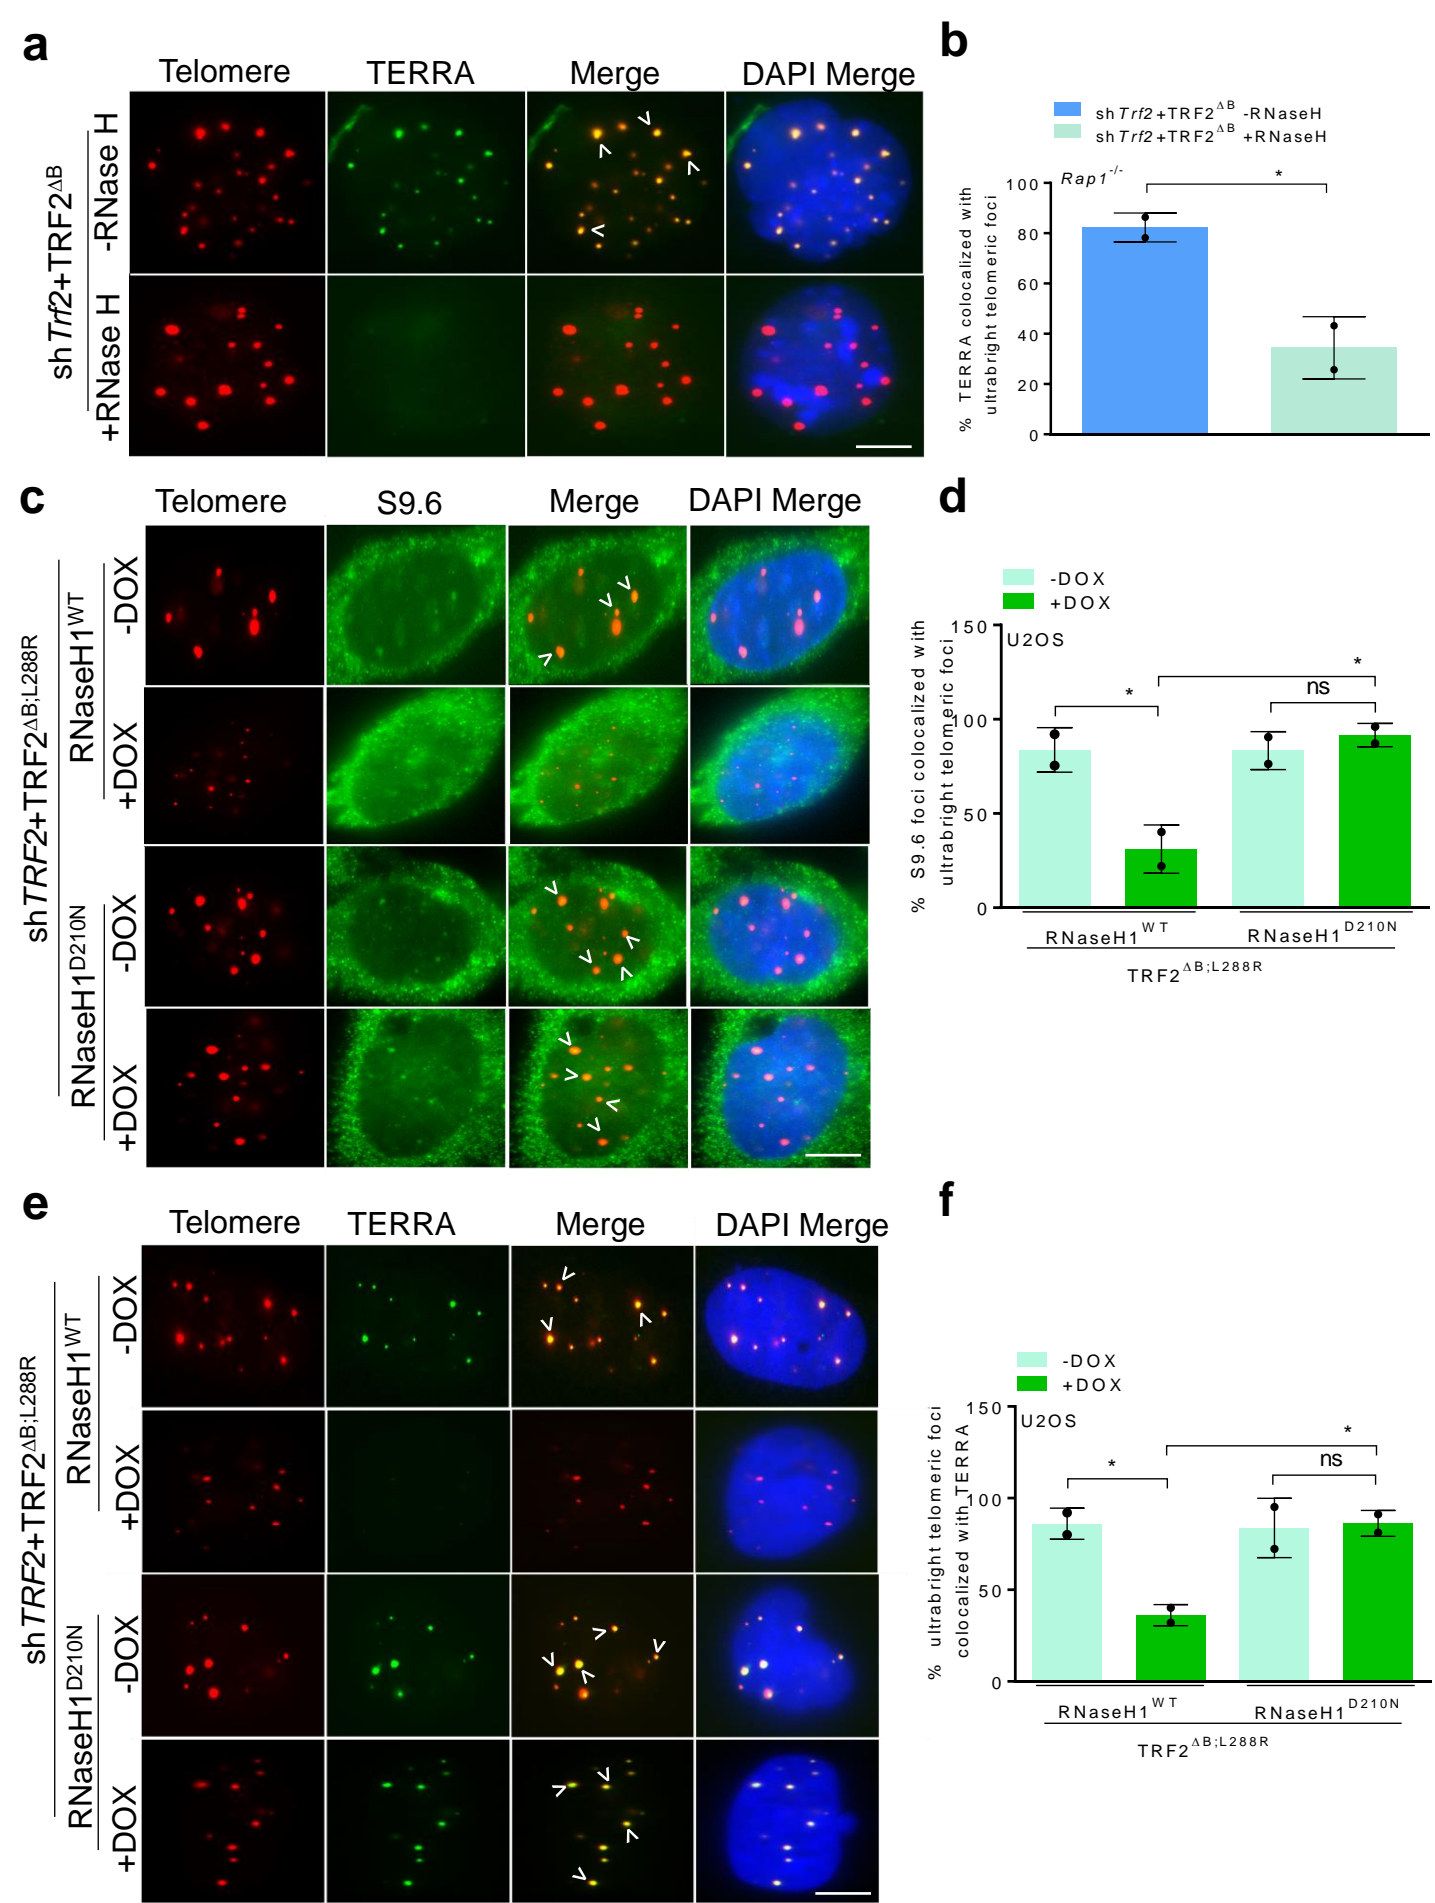

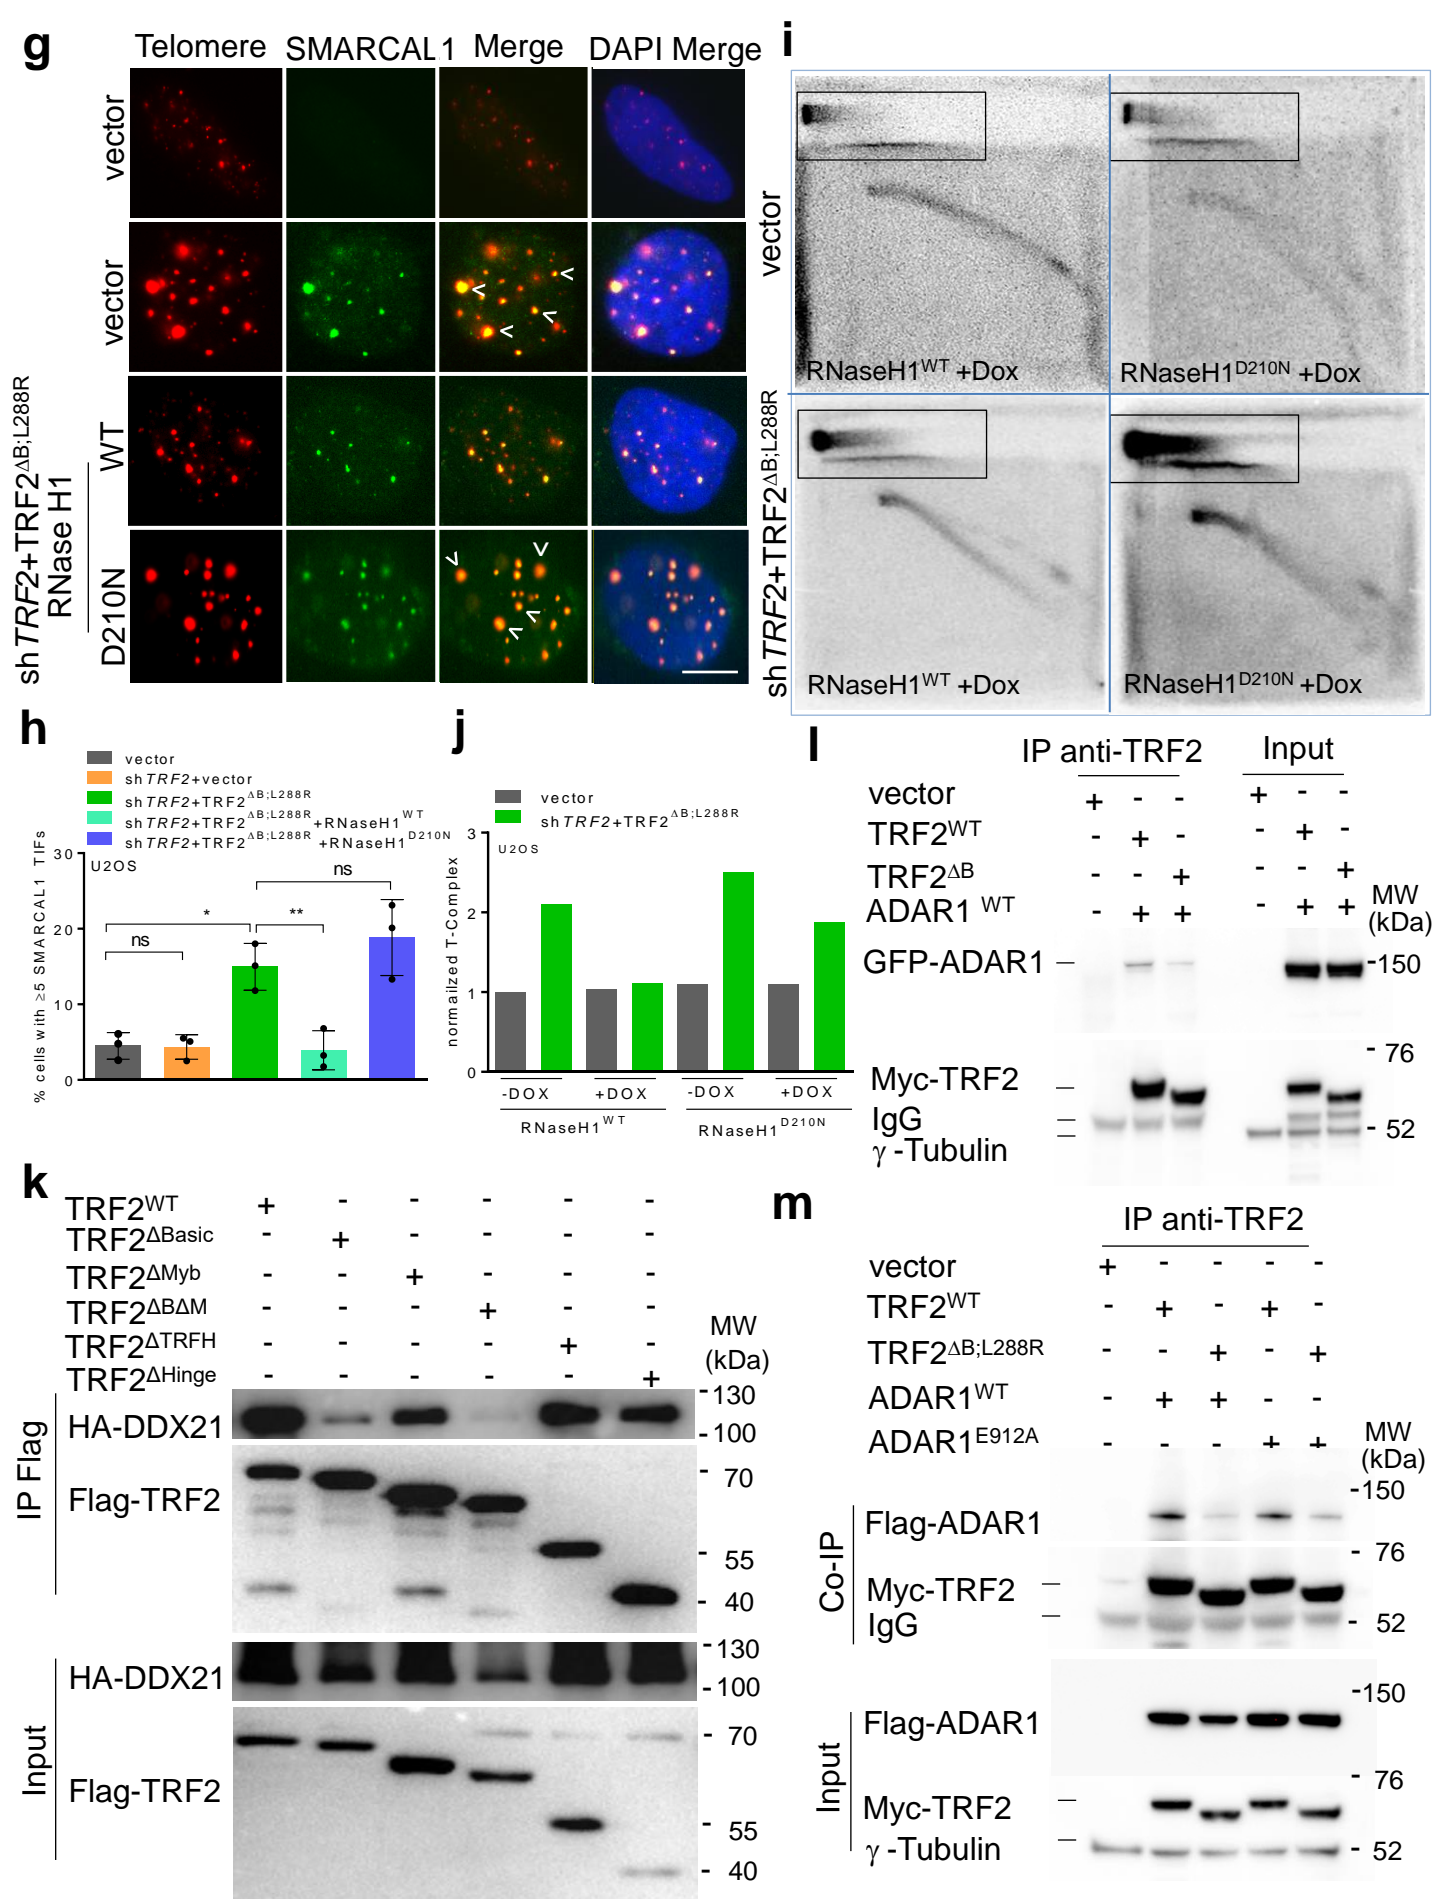

**Supplementary Fig. 5 a.** Representative images of IF-FISH from two independent experiments showing the loss of TERRA signal (green) at UTs after incubating the fixed cells with 5U RNaseH for 2h. Scale bars: 5 $\mu$ m. **b.** Quantification of TERRA foci in (a). The mean of two independent experiments  $\pm$  SD from a minimum 250 nuclei analyzed per experiment. \* $P=0.0384$  by two-sided unpaired t-test. **c.** Representative IF-FISH showing the specificity of S9.6 antibody (green) recognizing R-loops at UTs (red) in doxycycline inducible RNaseH1<sup>WT</sup> or catalytic dead RNaseH1<sup>D210N</sup> mutant in U2OS cells. S9.6 signal in the cytoplasm is an artifact. Scale bars: 5 $\mu$ m. **d.** Quantification of S9.6 staining in (c). The mean of two independent experiments shown as  $\pm$  SD from a minimum 250 nuclei analyzed per experiment. \* $P=0.0252$  by one-way ANOVA. ns: non-significant. **e.** IF-FISH showing the expression of TERRA (green) in doxycycline inducible RNaseH1<sup>WT</sup> or catalytic dead RNaseH1<sup>D210N</sup> mutant in U2OS cells expressing indicated protein. Scale bars: 5 $\mu$ m. **f.** Quantification of TERRA in (e). The mean of two independent experiments shown as  $\pm$  SD from a minimum 200 nuclei analyzed per experiment. \* $P=0.0272$  by one-way ANOVA. ns: non-significant. **g.** Representative images of IF-FISH showing UTs co-localized to SMARCAL1 (green) in U2OS cells expressing TRF2<sup>AB;L288R</sup> in the presence of RNaseH1<sup>WT</sup> or the catalytic dead RNaseH1<sup>D210N</sup> mutant. Scale bars: 5 $\mu$ m. **h.** Quantification of percent cells containing  $\geq 5$  SMARCAL1 foci co-localizing with UTs in (g). The mean of three independent experiments shown as  $\pm$  SD from a minimum 350 nuclei analyzed per experiment. \* $P=0.0130$ , \*\* $P=0.0092$  by one-way ANOVA. ns: non-significant. **i.** T-complex analysis using two-dimensional (2D) gel electrophoresis from genomic DNA isolated from doxycycline inducible RNaseH1<sup>WT</sup> or catalytic dead RNaseH1<sup>D210N</sup> mutant in U2OS. T-complex (outlined by the box). **j.** Quantification of T-complex signal intensities in vector was set at 100% in one representative experiment. **k.** Co-IP with Flag antibody with lysates from 293T cells expressing indicated proteins showing that the basic domain of TRF2 is essential to interact with DDX21. The blot shown is the representative of two independent experiments. **l.** Co-IP experiments with TRF2 antibody with lysates from U2OS cells expressing GFP-ADAR1p110<sup>WT</sup> with Myc-TRF2<sup>WT</sup> or Myc-TRF2<sup>AB</sup> showing that basic domain of TRF2 is essential to interact with ADAR1.  $\gamma$ -Tubulin served as loading control. The blot shown is the representative of two independent experiments. **m.** Co-IP experiments with TRF2 antibody with lysates from U2OS cells expressing Myc-TRF2<sup>AB;L288R</sup> with Flag-ADAR1<sup>WT</sup> or Flag-ADAR1<sup>E912A</sup> showing the interaction of TRF2 with ADAR1p110 is independent of ADAR1's catalytic activity.  $\gamma$ -Tubulin served as loading control. The blot shown is the representative of three independent experiments.

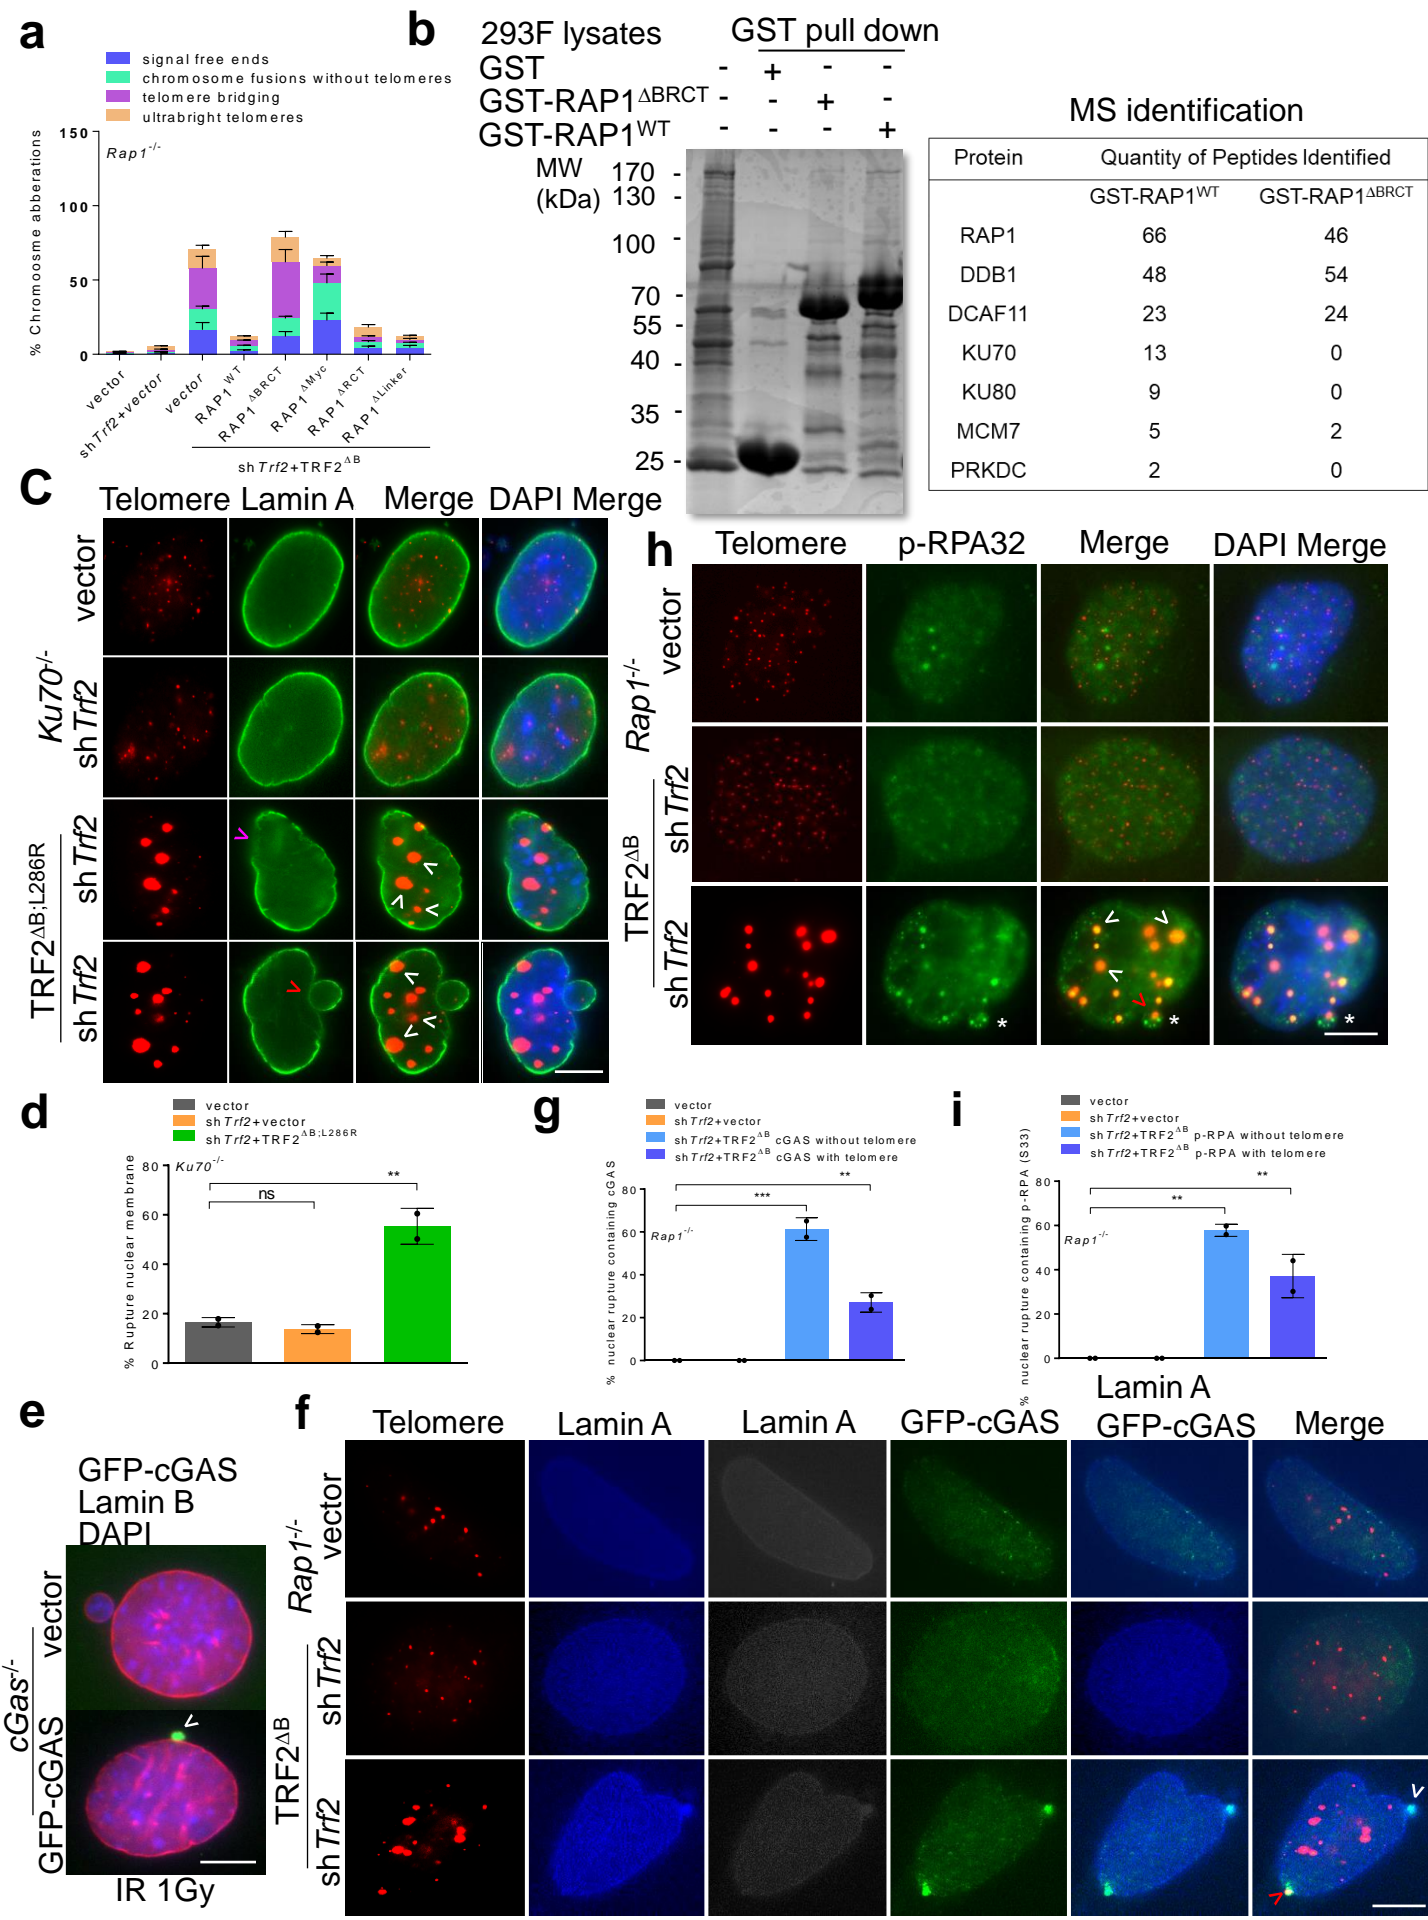

**Supplementary Fig. 6 a.** Quantification of signal free-ends, chromosome fusions without telomeres, telomere bridging, UTs in metaphase spread of *Rap1*<sup>-/-</sup> MEFs expressing Flag tagged TRF2<sup>ΔB</sup>-RAP1 fusion proteins. The mean values of three independent experiments ± SD are shown, at least 30 metaphases were analyzed per experiment. **b.** GST pull-down in 293F lysate followed by mass spectrometry identification using purified GST-RAP1 WT and GST-RAP1<sup>ΔBRCT</sup>. The blot shown is the representative of two independent experiments. **c.** IF-FISH showing holes in the NE in sh*Trf2* treated *Ku70*<sup>-/-</sup> MEFs expressing TRF2<sup>ΔB;L286R</sup>, characterized by discontinuous and reduced lamin A staining (pink, red arrowhead points to large hole). These cells display robust possessing UTs (white arrowheads) not detected in *Ku70*<sup>-/-</sup> MEFs treated only with sh*Trf2*. Scale bars: 5μm. **d.** Quantification of nuclear rupture in (c). Data shown as the mean of two independent experiments ± SD from a minimum 250 nuclei analyzed per experiment. \*\**P*=0.0066 by one-way ANOVA. ns: non-significant. **e.** Representative positive control from two independent experiments showing GFP-cGAS (green) reconstituted in *cGas*<sup>-/-</sup> MEFs localized to NE rupture site (white arrowhead) after 1 Gy irradiation. Lamin B1 (red) stains nuclear envelope. Scale bars: 5μm. **f.** Representative IF-FISH from *Rap1*<sup>-/-</sup> MEFs showing altered lamin A (blue) promote GFP-cGAS (green) localization to NE rupture sites with indicated treatment. cGAS localization at NE rupture sites with (red arrowhead) and without telomere (white arrowhead). Scale bars: 5μm. **g.** Quantification of GFP-cGAS at NE rupture sites in (f). Data shown as the mean of two independent experiments ± SD from a minimum 150 nuclei analyzed per experiment. \*\**P*=0.0051, \*\*\**P*=0.0002, by one-way ANOVA. **h.** Representative IF-FISH showing that p-RPA32 (S33) foci (green) at NE rupture sites (\*) containing telomere (red arrowhead) in *Rap1*<sup>-/-</sup> MEFs expressing indicated proteins. p-RPA32 (S33) foci colocalized with UTs (white arrowheads). Scale bars: 5μm. **i.** Quantification of NE rupture sites containing p-RPA32 (S33) foci with or without telomere in (h). Data shown as the mean of two independent experiments ± SD from a minimum 200 nuclei analyzed per experiment. \*\**P*=0.0012 by one-way ANOVA.

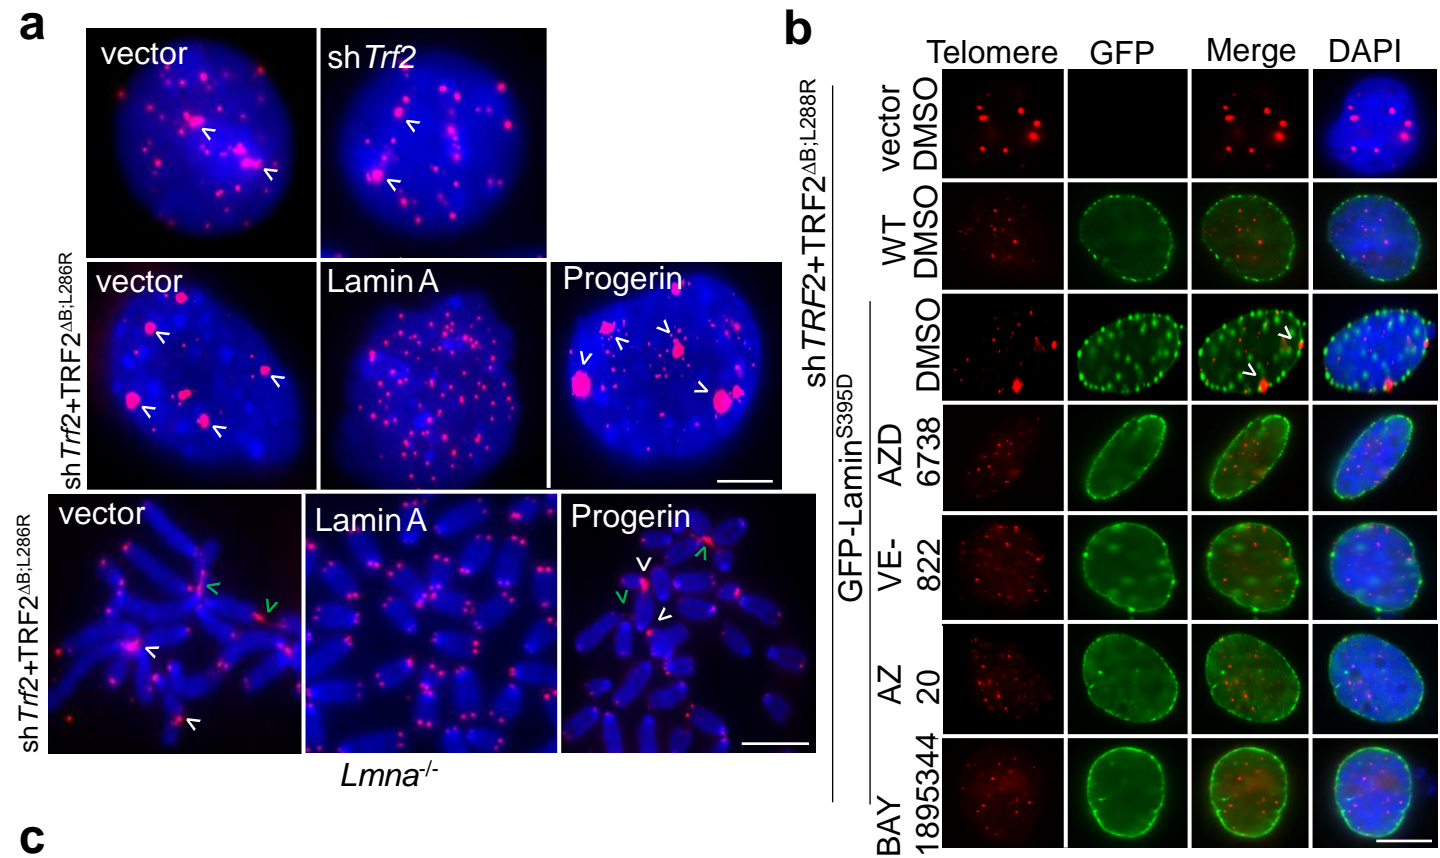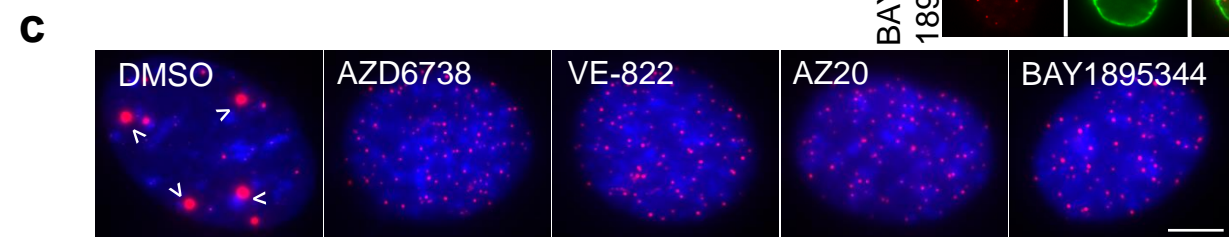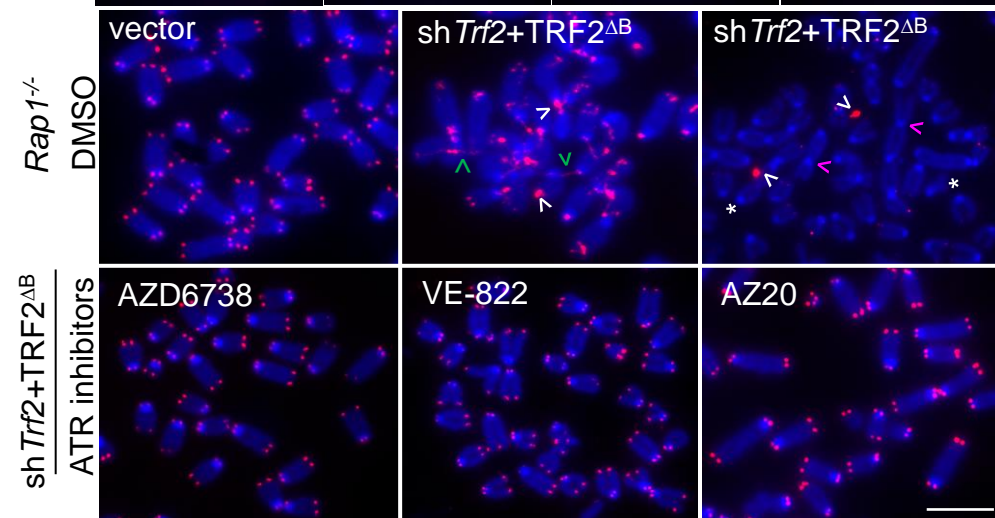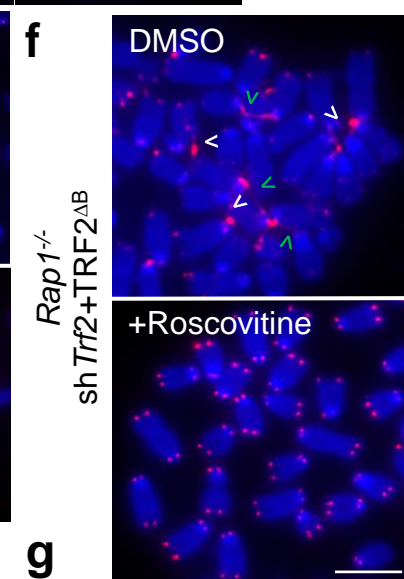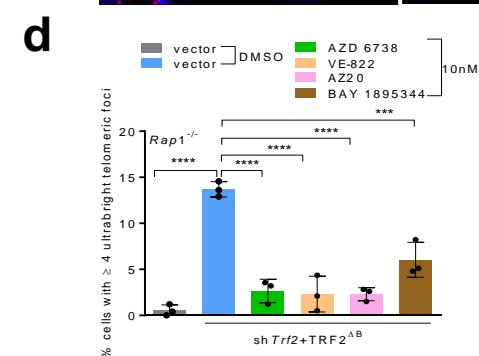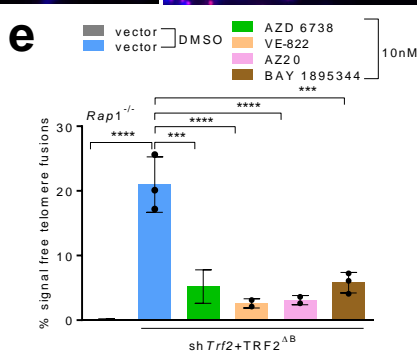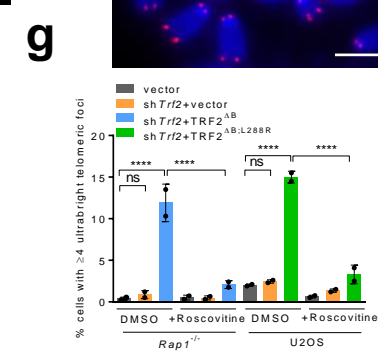



**Supplementary Fig. 7 a.** Representative PNA-FISH of interphase nuclei and metaphases from three independent experiments showing the formation of CCCTAA-positive filaments (green arrowheads) and UTs (white arrowheads) in *Lmna*<sup>-/-</sup> MEFs treated with sh*Trf2*+TRF2<sup>ΔB;L286R</sup>. Scale bars: 5μm. **b.** Representative IF-FISH images from two independent experiments showing the impact ATR inhibitor in the generation of UTs in U2OS cells expressing GFP-lamin<sup>S395D</sup> (green) and TRF2<sup>ΔB;L288R</sup>. Scale bars: 5μm. **c.** PNA-FISH on interphase nuclei and metaphases showing the formation of CCCTAA-positive filaments (green arrowheads), UTs (white arrowheads), signal free ends (\*) and fused chromosome without telomere at the fusion site (pink arrowheads) in *Rap1*<sup>-/-</sup> MEFs treated with sh*Trf2*+TRF2<sup>ΔB</sup> in the absence and presence of ATR inhibitors. Scale bars: 5μm. **d.** Quantification of UT frequencies in (c). Data represents the mean of three independent experiments ± SD from a minimum 300 nuclei analyzed per experiment. \*\*\**P*=0.0001, \*\*\*\**P*<0.0001 by one-way ANOVA. **e.** Quantification of signal free ends in (c). Data represents the mean of three independent experiments ± SD from a minimum 300 nuclei analyzed per experiment. \*\*\**P*=0.0001, \*\*\*\**P*<0.0001 by one-way ANOVA. **f.** PNA-FISH on metaphase spread showing CCCTAA-positive filaments (green arrowheads) and UTs (white arrowheads) in *Rap1*<sup>-/-</sup> MEFs treated with sh*Trf2*+TRF2<sup>ΔB</sup> in the absence and presence of 5.0 μM Roscovitine. Scale bars: 15μm. **g.** Quantification of UTs in the interphase nuclei of *Rap1*<sup>-/-</sup> MEFs and U2OS cells treated with DMSO or 5.0 μM Roscovitine. Data represents the mean of two independent experiments ± SD from a minimum 200 nuclei analyzed per experiment. \*\*\*\**P*<0.0001 by one-way ANOVA. ns: non-significant.
